# Supplementary material
Source: PubMed Central journal article supplement (PMC8644581)
Supplement: kiab394_supplementary_data.pdf [file kiab394_supplementary_data.pdf]

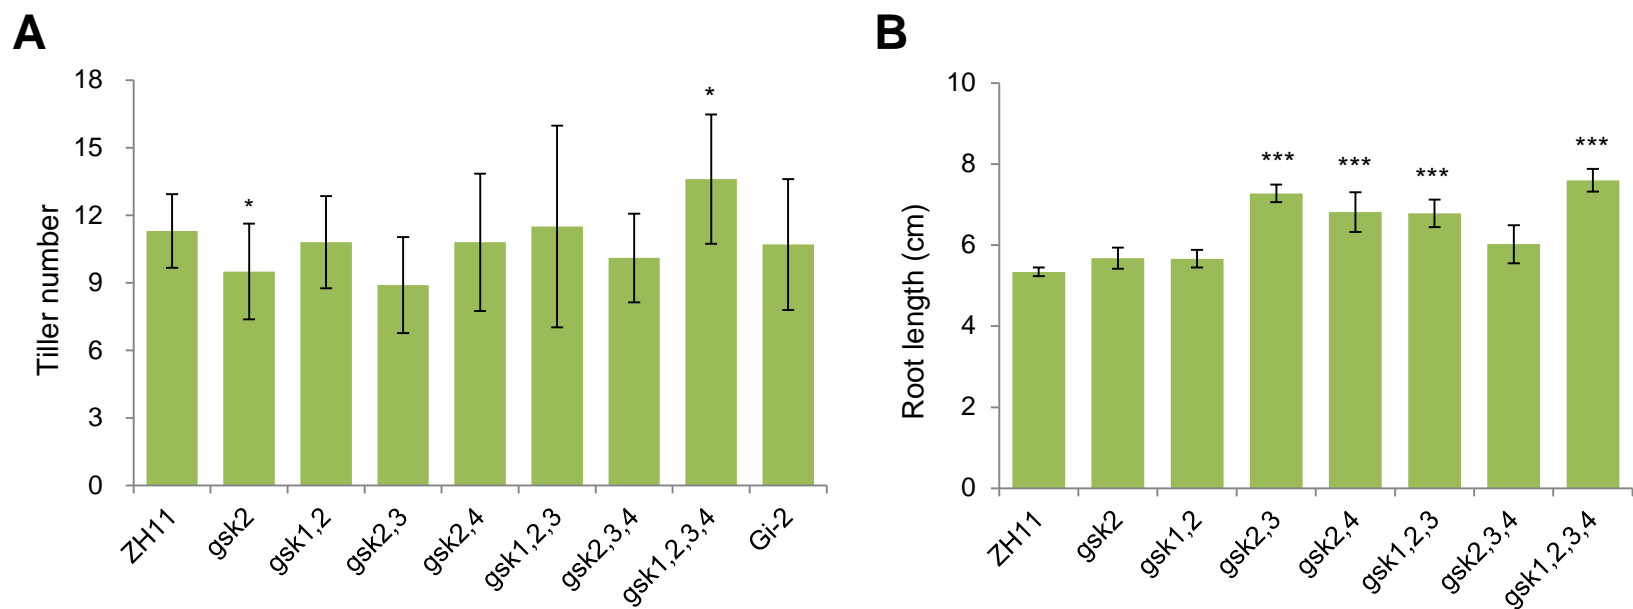

**Supplemental Figure S1. Tiller number and root length of GSK-related mutants.** (A) Tiller number was counted at the harvesting stage. Bars indicate SD ( $n = 10$ ). \* $P < 0.05$  generated by  $t$ -test. (B) Root length was measured after ten-day growth on agar media. Bars indicate standard error of mean values (SEM,  $n = 14 - 30$ ). \*\*\* $P < 0.001$  generated by  $t$ -test.

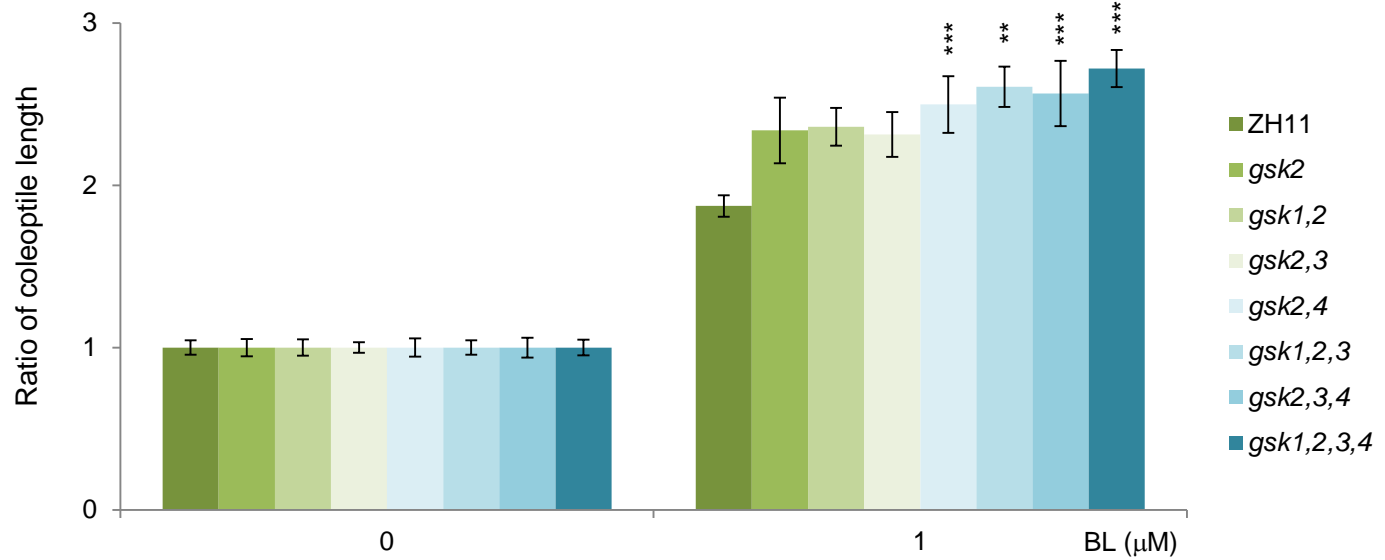

**Supplemental Figure S2. BR sensitivity of GSK-related mutants evaluated by coleoptile elongation test.** Coleoptile length was measured after ten-day growth on agar media with or without BL, and the ratios of BL-treated plants on those untreated were shown. Bars indicate SEM ( $n = 11 - 30$ ). \*\* $P < 0.01$  and \*\*\* $P < 0.001$  generated by  $t$ -test.

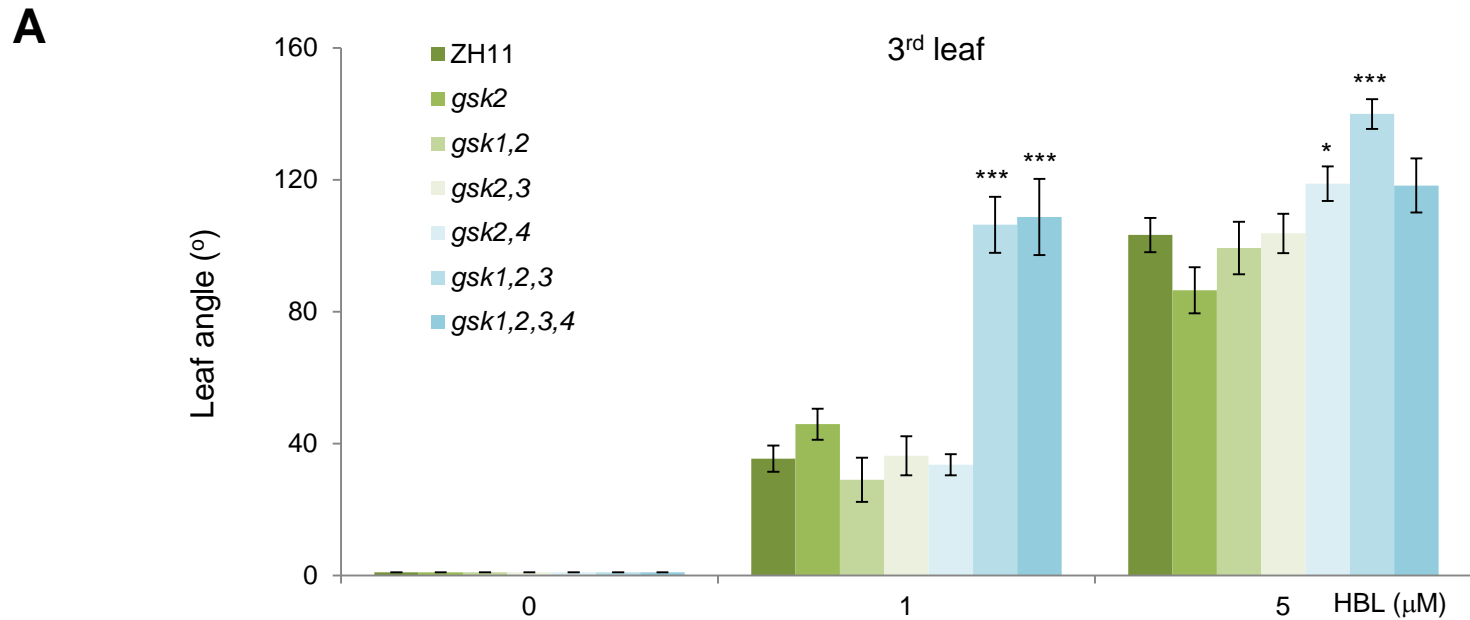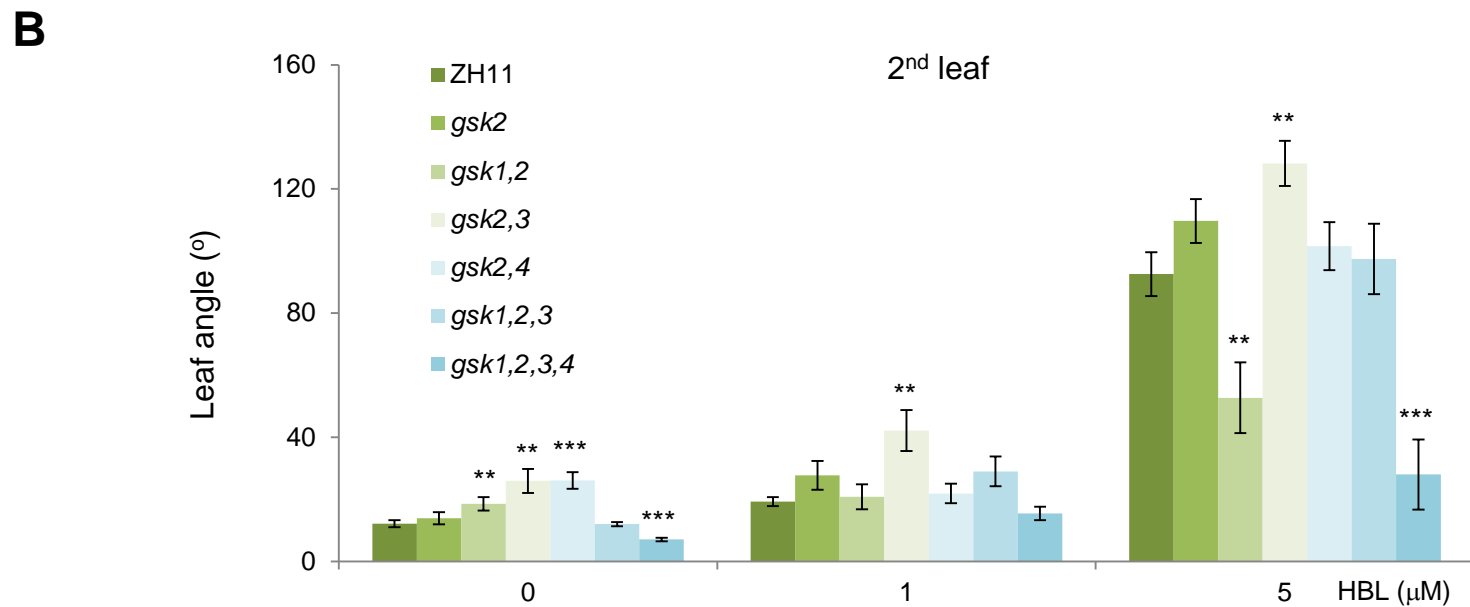

**Supplemental Figure S3. BR sensitivity of GSK-related mutants evaluated by lamina bending tests of the 2<sup>nd</sup> and 3<sup>rd</sup> leaves.** HBL (28-homobrassinolide) was used as BR for the analysis. HBL was applied at 3 days after germination when the 2<sup>nd</sup> leaves were emerging and leaf angles were measured after additional 4-d-growth. Note that at the time measuring the angles of the 3<sup>rd</sup> leaves, those without HBL treatment have not inclined thus were counted as zero. Bars indicate SEM ( $n = 15 - 24$ ). \* $P < 0.05$ , \*\* $P < 0.01$  and \*\*\* $P < 0.001$  generated by  $t$ -test.

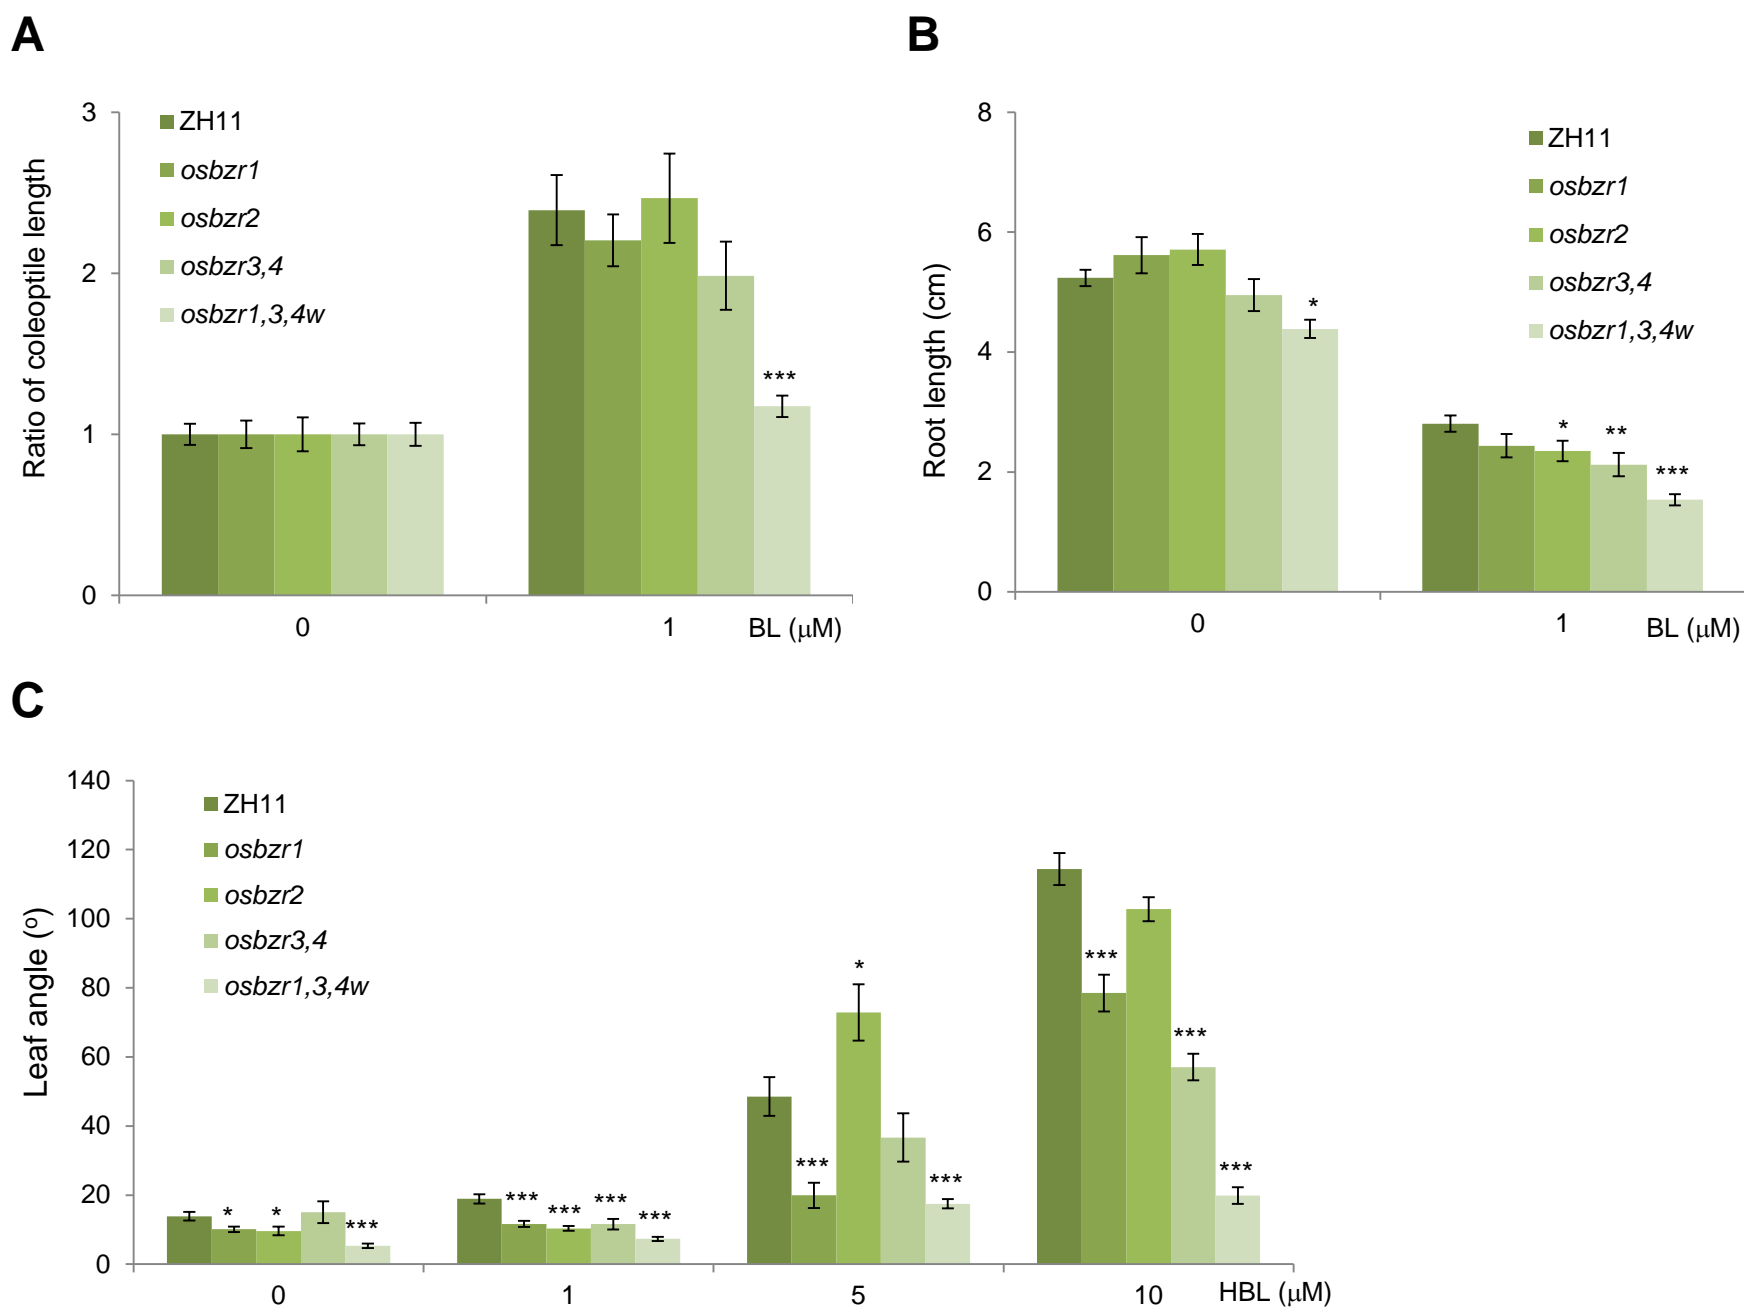

**Supplemental Figure S4. BR sensitivity tests of *OsBZR*-related mutants.** (A) Coleoptile length was measured after ten-day growth on agar media, and the ratios of BL-treated plants on those untreated were shown. Bars indicate SEM ( $n = 8 - 21$ ). \*\*\* $P < 0.001$  generated by  $t$ -test. (B) Root length was measured after ten-day growth on agar media. Bars indicate SEM ( $n = 8 - 25$ ). \* $P < 0.05$ , \*\* $P < 0.01$  and \*\*\* $P < 0.001$  generated by  $t$ -test. (C) HBL was applied at 3 days after germination when the 2<sup>nd</sup> leaves were emerging and angles (the 2<sup>nd</sup> leaves) were measured after additional 4-d-growth. Bars indicate SEM ( $n = 20 - 26$ ). \* $P < 0.05$ , \*\* $P < 0.01$  and \*\*\* $P < 0.001$  generated by  $t$ -test.

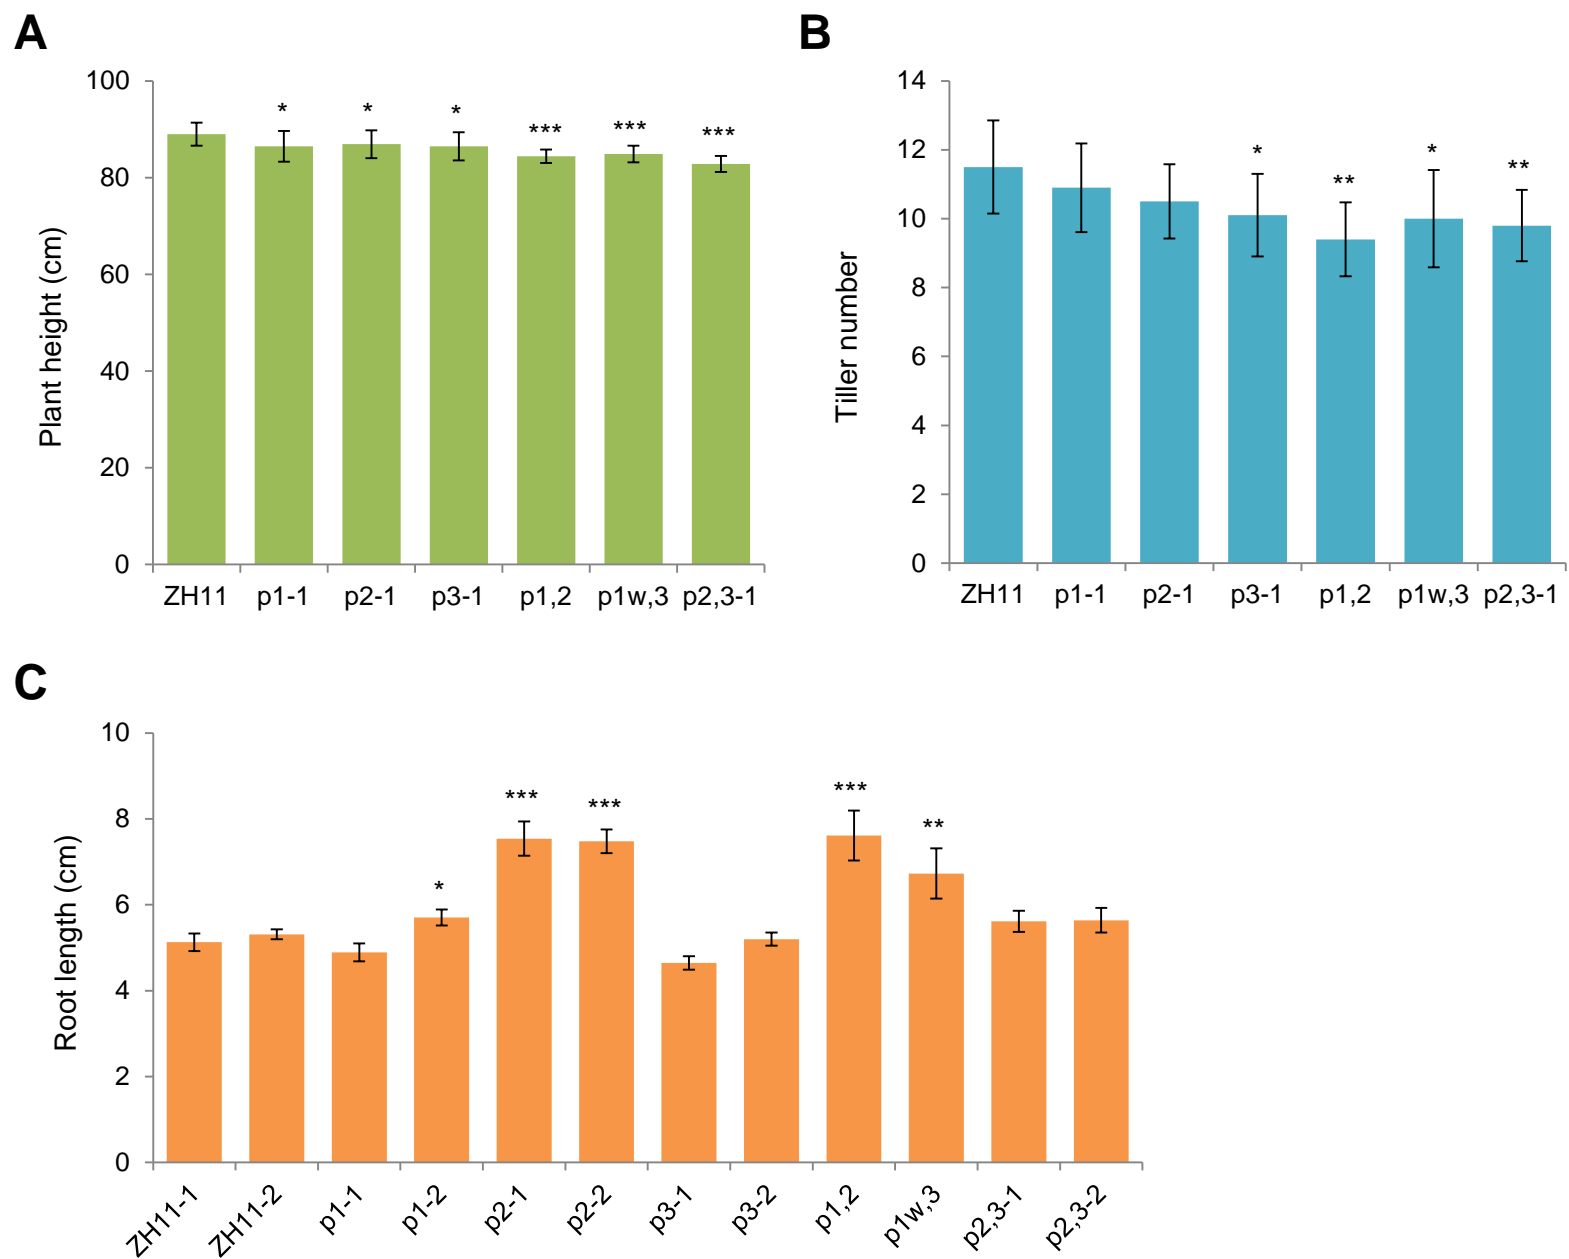

**Supplemental Figure S5. Plant height, tiller number, and root length of *PPKL*-related mutants.** (A) Plant height was measured at the harvesting stage. Bars indicate SD ( $n = 16$ ). \* $P < 0.05$  and \*\*\* $P < 0.001$  generated by  $t$ -test. (B) Tiller number was counted at the harvesting stage. Bars indicate SD ( $n = 10$ ). \* $P < 0.05$  and \*\* $P < 0.01$  generated by  $t$ -test. (C) Root length was measured after ten-day growth on agar media. A replicate of ZH11 was involved for the analysis. Bars indicate SEM ( $n = 19 - 22$ ). \* $P < 0.05$ , \*\* $P < 0.01$  and \*\*\* $P < 0.001$  generated by  $t$ -test.

**A**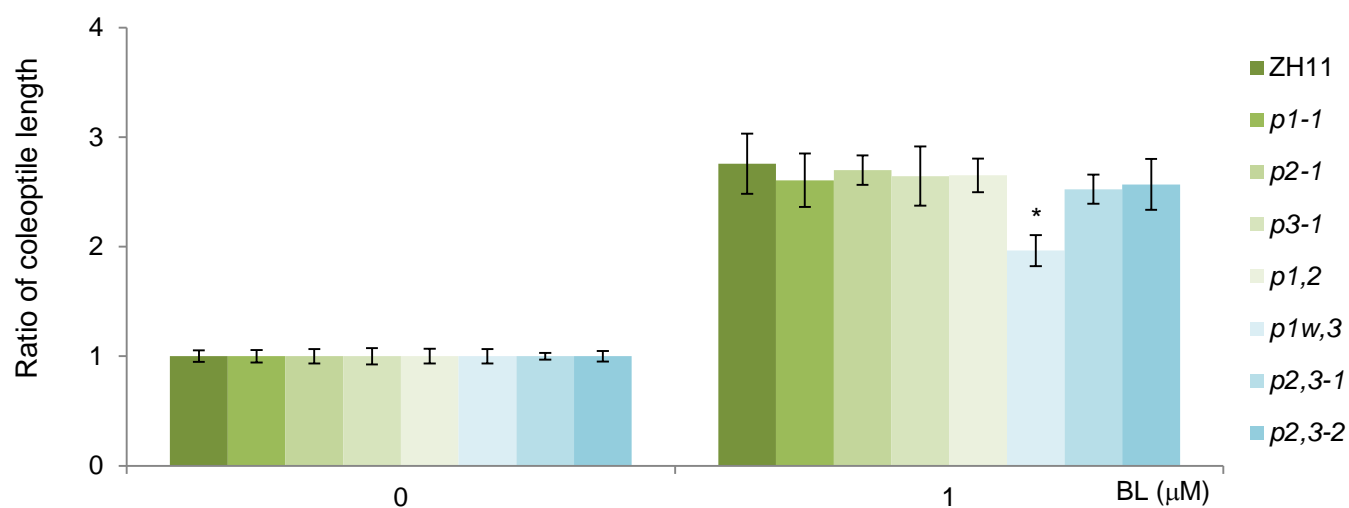**B**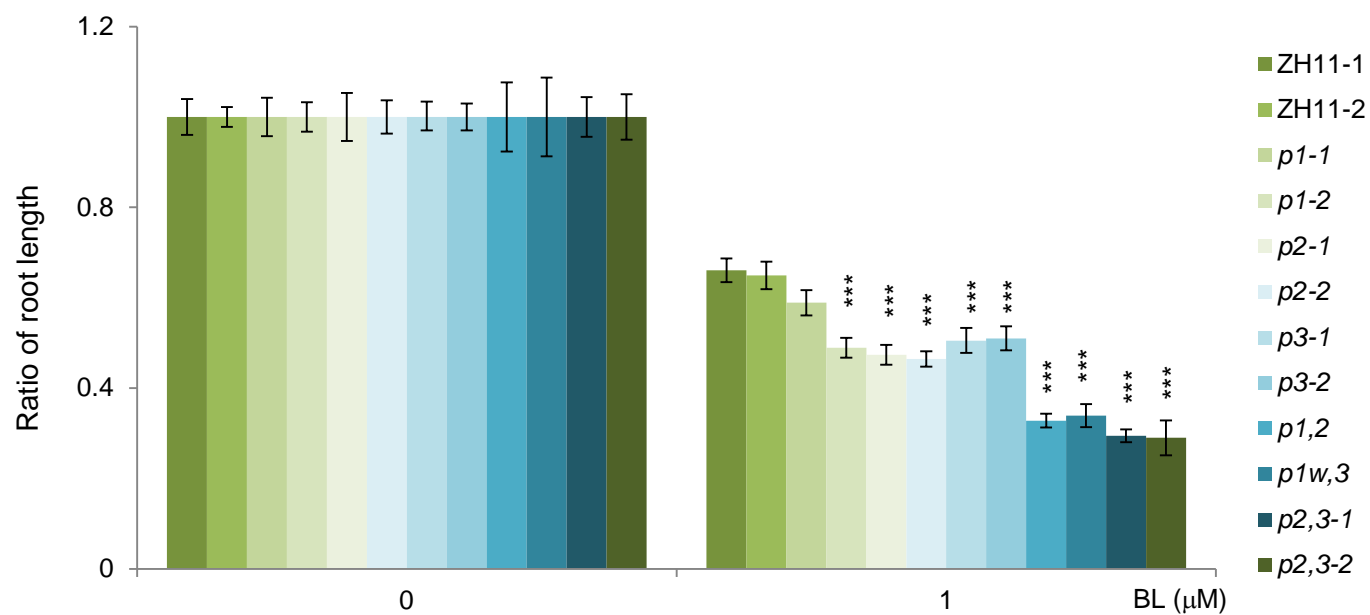

**Supplemental Figure S6. BR sensitivity of *PPKL*-related mutants evaluated by coleoptile elongation test and root inhibition test.** Coleoptile length and root length were measured after ten-day growth on agar media, and the ratios of BL-treated plants on those untreated were shown. Bars indicate SEM ( $n = 15 - 26$ ). \* $P < 0.05$  and \*\*\* $P < 0.001$  generated by  $t$ -test.

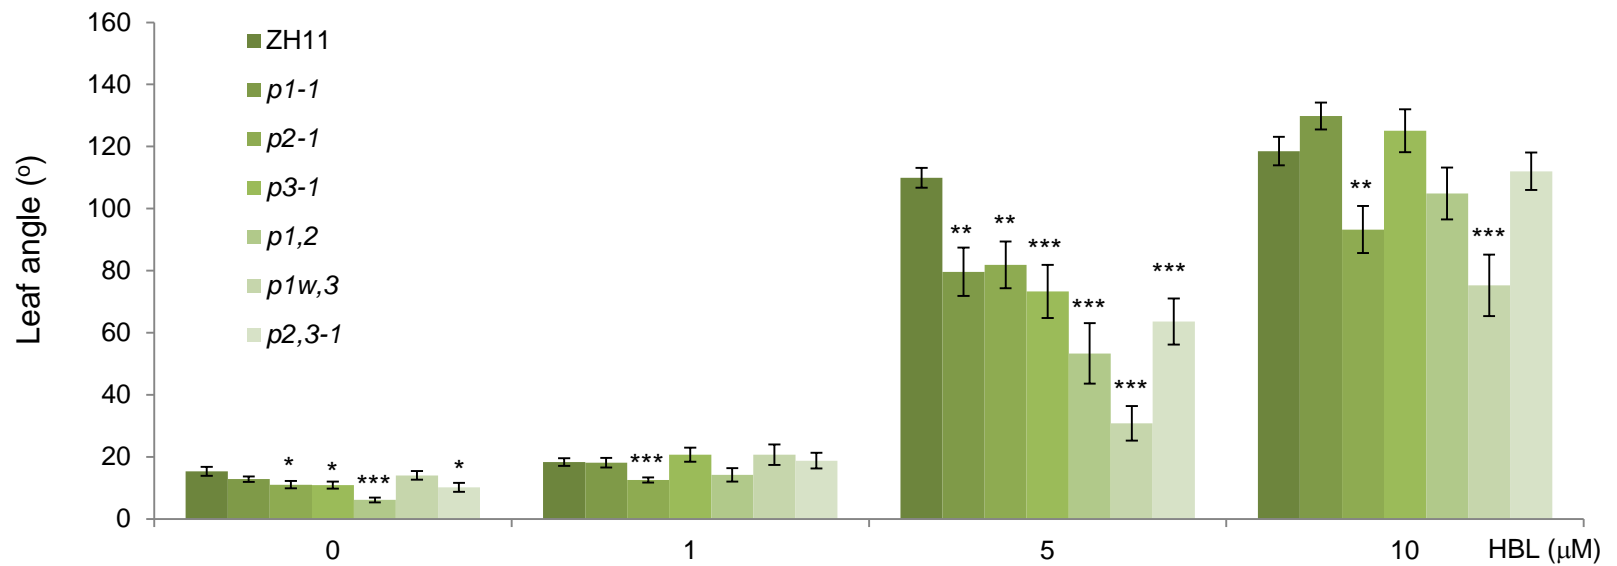

**Supplemental Figure S7. BR sensitivity of *PPKL*-related mutants evaluated by lamina bending test.** HBL was applied at 3 days after germination when the 2<sup>nd</sup> leaves were emerging and angles (the 2<sup>nd</sup> leaves) were measured after additional 4-d-growth. Bars indicate SEM ( $n = 16 - 31$ ). \* $P < 0.05$ , \*\* $P < 0.01$  and \*\*\* $P < 0.001$  generated by *t*-test.

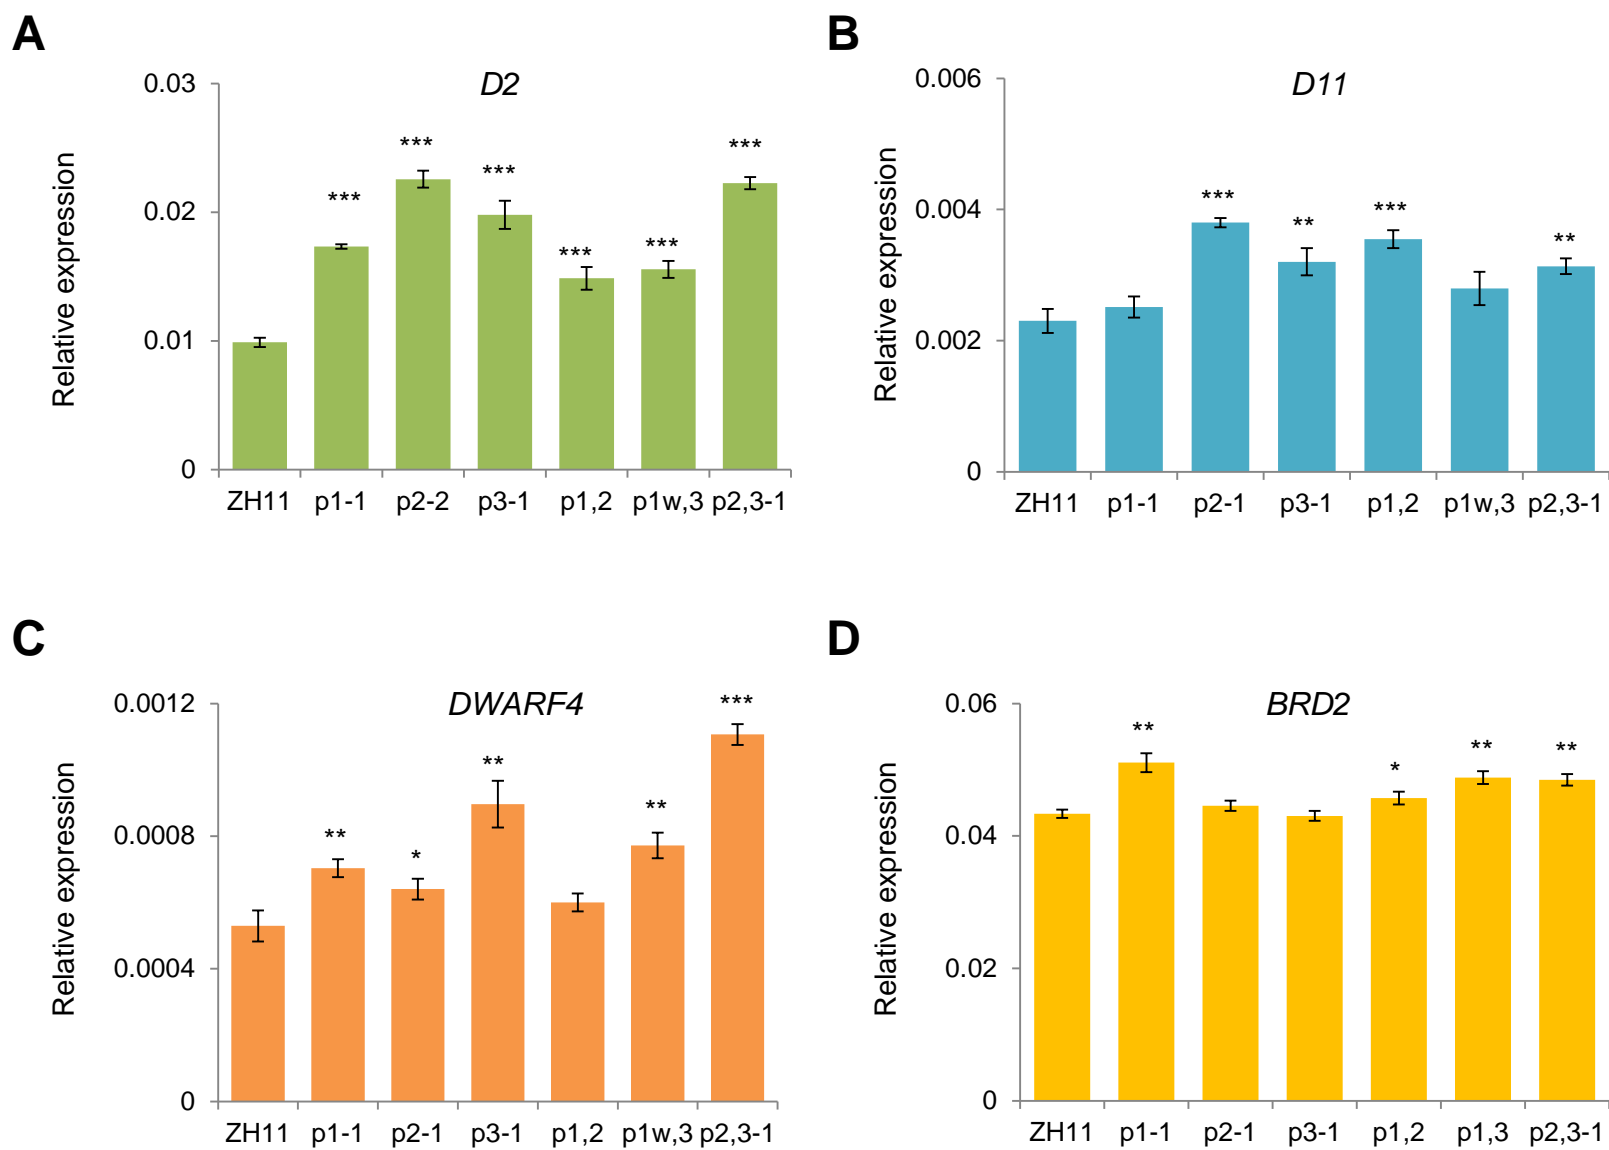

**Supplemental Figure S8. Expression of BR-synthetic genes in the shoots of one-week-old seedlings of different plants.** Bars indicate SD ( $n = 3$ ). \* $P < 0.05$ , \*\* $P < 0.01$  and \*\*\* $P < 0.001$  generated by  $t$ -test.



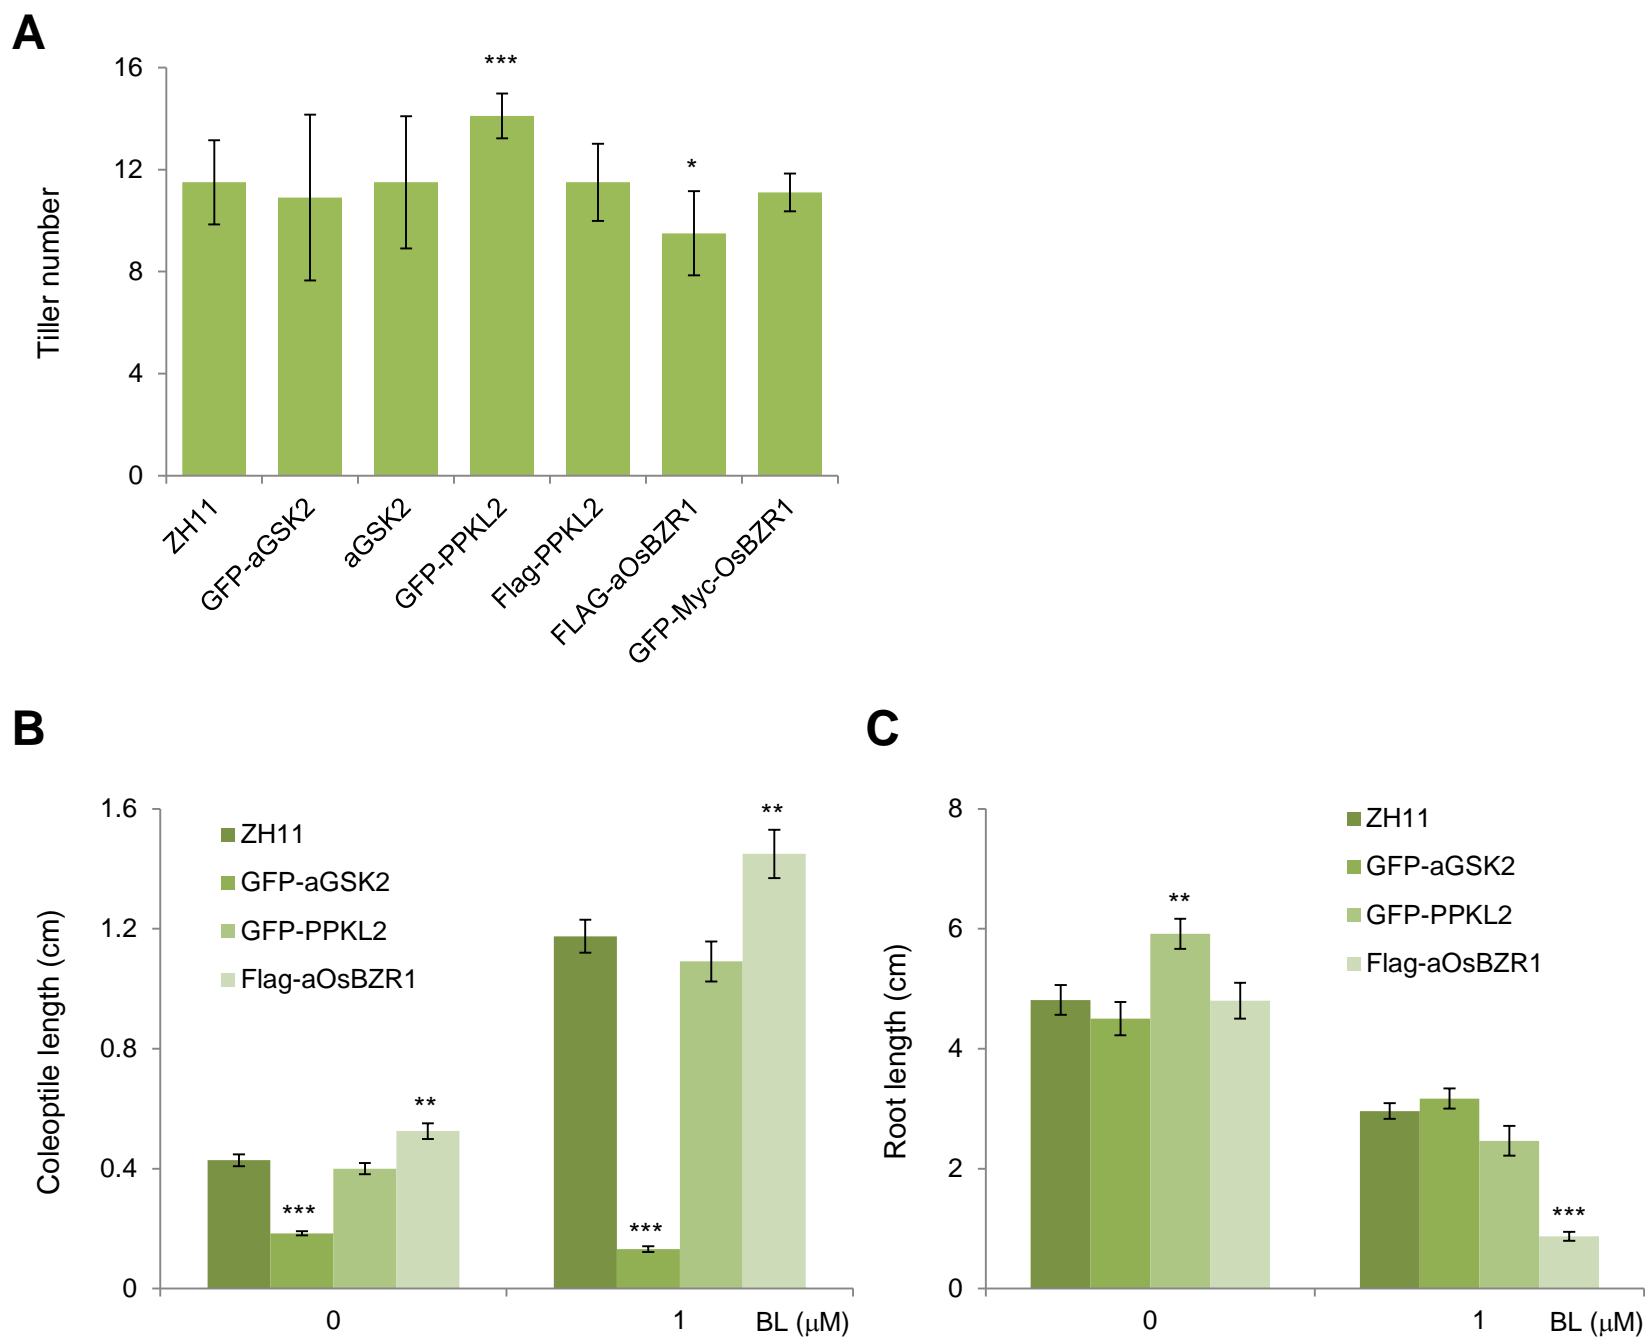

**Supplemental Figure S9. Tiller number and BR sensitivities of the representative overexpression plants.** (A) Tiller number was counted at the harvesting stage. Bars indicate SD ( $n = 10$ ).  $*P < 0.05$  and  $***P < 0.001$  generated by  $t$ -test. (B and C) Coleoptile length and root length were measured after ten-day growth on agar media with or without BL. Bars indicate SEM ( $n = 10 - 19$ ).  $**P < 0.01$  and  $***P < 0.001$  generated by  $t$ -test.

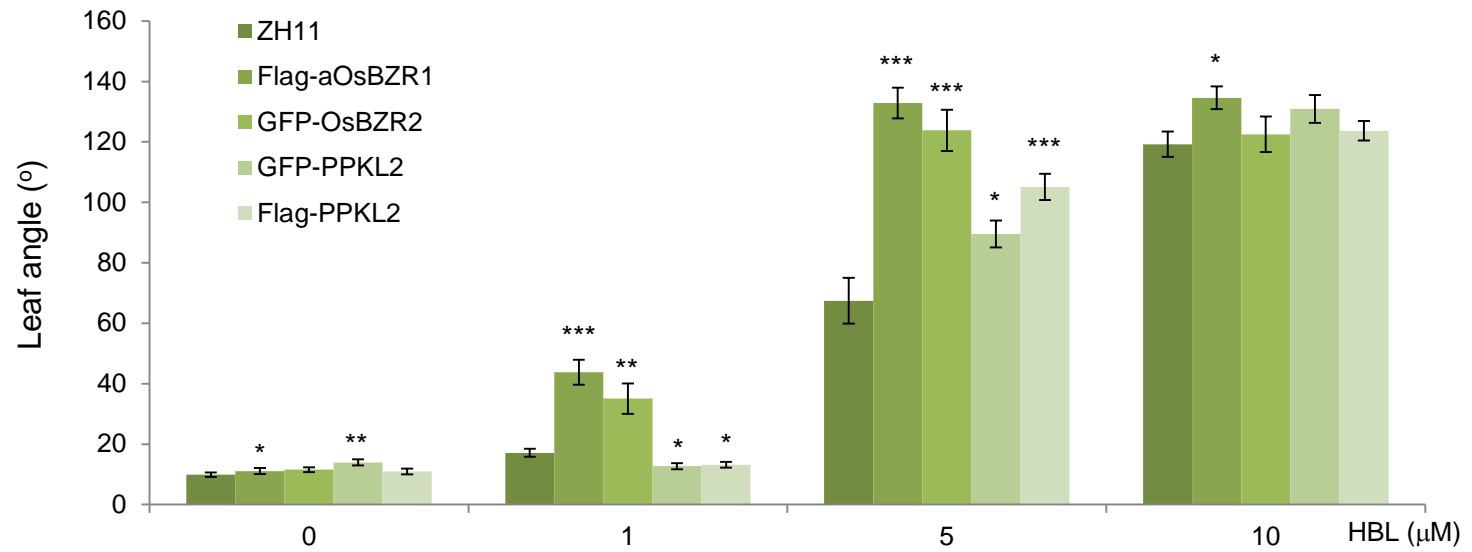

**Supplemental Figure S10. BR sensitivity of the overexpression plants evaluated by lamina bending test.** HBL was applied at 3 days after germination when the 2<sup>nd</sup> leaves were emerging and angles (the 2<sup>nd</sup> leaves) were measured after additional 4-d-growth. Bars indicate SEM ( $n = 16 - 31$ ). \* $P < 0.05$ , \*\* $P < 0.01$  and \*\*\* $P < 0.001$  generated by  $t$ -test.

**Supplemental Table S1. Primer sequences for mutation identification.**

| Name          | 5' - 3' sequence       |
|---------------|------------------------|
| GSK1-F        | GCGATTTCTCATGCGATTTT   |
| GSK1-R        | ACCAGAACCTTTGCACTTCC   |
| GSK2-F        | GGTGCTCATTTTTGGTGGTT   |
| GSK2-R        | AGGGTGGAAAAGGCCAATAC   |
| GSK3-F        | GTGGGAACTGGATCATTTGG   |
| GSK3-R        | CCCTCTTGAAAACCAGAAAGAA |
| GSK4-F        | GGACAAAGAATGTCGCATGA   |
| GSK4-R        | AGTAGCATCCGCCACAAATC   |
| BZR1-F:       | AGAGGGAAAGCACGCTACTG   |
| BZR1-R:       | CTCGGGAAGCTCGACGAC     |
| BZR2-F:       | GCGTGATCTCTTCTCGCTTC   |
| BZR2-R:       | AATCGCCCTAGCAAAGGATT   |
| BZR3-F:       | GACTGCTCCTTCCTCCTCCT   |
| BZR3-R:       | AGCTCGAATCGAAGCAAAAA   |
| BZR4-F:       | ATGATGAACGGAGGAGGGGG   |
| BZR4-R:       | AGCGCCACAGCATCATCTCT   |
| PPKL1-F       | CTGCTGGTTTATCTGCCGAG   |
| PPKL1-sg1-R   | CAAACCTTACATGCATGGTGGC |
| PPKL1-sg2-F   | CAAACCACCCGACGAATC     |
| PPKL1-sg2-R   | CCGTCCTCCTTCTTCTCGAT   |
| PPKL1-sg3-F   | GTACAAAATTGTTTTCGGTT   |
| PPKL1-sg3-R   | GAGGCTCACCTTGTGGAGTAA  |
| PPKL2-sg1-F   | CCTGGTTGGTTGGTTTCAGC   |
| PPKL2-sg1-R   | GACGACAACGGCGAAGTAGA   |
| PPKL2-sg2-F   | GGAGCTAGGGTTTTGGAGGT   |
| PPKL2-sg2-R   | AAGGGATGAGGAGACCTGGA   |
| PPKL3-sg1-F   | TCCTAGGGTAACCCACCACT   |
| PPKL3-sg1-R   | TTGTTGGCACAAGCATGCAA   |
| PPKL3-sg2/3-F | GGTGTGGCGTGTCTACCTA    |
| PPKL3-sg2/3-R | CCGTCCTCCTTCTTCTCCAT   |
| NPT-F         | CATGTGTCACGACGAGATCC   |
| NPT-R         | CGACAATCCCACTATCCTT    |
| HPT-F         | TAGGAGGGCGTGGATATGTC   |
| HPT-R         | TACACAGCCATCGGTCCAGA   |

**Supplemental Table S2. Primer sequences for vector constructions.**

| Name               | 5' - 3' sequence (Restriction enzyme sites were indicated) |
|--------------------|------------------------------------------------------------|
| LC-PPKL2-F         | GGCAGCGGCC <u>GAATTC</u> ATGGGGACGGCGGGGAAG (EcoRI)        |
| LC-PPKL2-R         | GTCGACTGCAG <u>AATTC</u> TTCATATATAAGCAAGAGAAT (EcoRI)     |
| Flag-PPKL2-F       | CGAAATCGAT <u>GGATCC</u> GATGGGGACGGCGGGGAAG (BamHI)       |
| Flag-PPKL2-R       | AGGCTACGTAG <u>GATCC</u> TTCATATATAAGCAAGAGAAT (BamHI)     |
| LC-aGSK2-F         | GGCAGCGGCC <u>GAATTC</u> ATGGACCAGCCGGCGCC (EcoRI)         |
| LC-aGSK2-R         | GTCGACTGCAG <u>AATTC</u> TTAGCTCCCAGTATTGAAGAAG (EcoRI)    |
| LM-GSK2-F          | GGGCCGCGACT <u>CTAGA</u> ATGGACCAGCCGGCGCC (XbaI)          |
| LM-GSK2-R          | AAAGCAGGACT <u>CTAGA</u> TTAGCTCCCAGTATTGAAGAAG (XbaI)     |
| Flag-GSK2-F        | CGAAATCGAT <u>GGATCC</u> GATGGACCAGCCGGCGCC (BamHI)        |
| Flag-GSK2-R        | AGGCTACGTAG <u>GATCC</u> TTAGCTCCCAGTATTGAAGAAG (BamHI)    |
| LM-aOsBZR1-F       | AAGAGGACTT <u>GAATTC</u> ATGACGTCCGGGGCGGCG (EcoRI)        |
| LM-aOsBZR1-R       | CCGGGTACCG <u>AATTC</u> CATTTTCGCGCCGACGCC (EcoRI)         |
| Flag-aOsBZR1-F     | CGAAATCGAT <u>GGATCC</u> TATGACGTCCGGGGCGG (BamHI)         |
| Flag-aOsBZR1-R     | AGGCTACGTAG <u>GATCC</u> CATTTTCGCGCCGACGCC (BamHI)        |
| LC-OsBZR2-F        | GGCAGCGGCC <u>GAATTC</u> ATGGCGACGGGAGGAGGAGG (EcoRI)      |
| LC-OsBZR2-R        | GTCGACTGCAG <u>AATTC</u> TTAAGCAGCAGCTTTGTCTAGAGCT (EcoRI) |
| For point mutation |                                                            |
| aOsBZR1-1F         | ATGACGTCCGGGGCGGCGGC                                       |
| aOsBZR1-1R         | TCGCACTCCGGTATCGTGTCC <u>A</u> GGTGCTCGAGGCGGCGGC          |
| aOsBZR1-2F         | GCCGCCGCCTCGAGCACCT <u>T</u> GGACACGATACCGGAGTGCGA         |
| aOsBZR1-2R         | TTTCGCGCCGACGCCGAGCG                                       |

**Supplemental Table S3. Primer sequences for RT-qPCR analysis.**

| Name      | 5' - 3' sequence      |
|-----------|-----------------------|
| OsGSK1q-F | ACGGGTCACATCATCTCC    |
| OsGSK1q-R | AGTTCCTACAACCTCGCTCC  |
| OsGSK2q-F | CCAACCCGTGAGGAAA      |
| OsGSK2q-R | GCGTGAAGCGAGGTCTA     |
| OsGSK3q-F | CAGCCTCTCTTTCCTGGTGA  |
| OsGSK3q-R | GGGATTCATGCAGCGGATTT  |
| OsGSK4q-F | GGAGGGAAGAACGATG      |
| OsGSK4q-R | TTGCCTGGAATACAACAC    |
| D2q-F     | AAACCGACATGGGTGAGACC  |
| D2q-R     | ACCGCAGCGTCTCTGTTATC  |
| D11q-F    | CCTAGGGGAGGACCACAAGA  |
| D11q-R    | CCAAGGTAGCTGGGCTTGAG  |
| DWARF4q-F | GTGCTCAACTTCAGGTGGGA  |
| DWARF4q-R | CCTAATGGGAAGGCCCTTGG  |
| BRD2q-F   | GCATTGCCGCCAAAAGTATG  |
| BRD2q-R   | TCCTGCACCTCCTTCTCAGTC |
| UBQq-F    | GAGCCTCTGTTTCGTCAAGTA |
| UBQq-R    | ACTCGATGGTCCATTAACC   |
